# Supplementary material for: Use of ChIP-Seq data for the design of a multiple promoter-alignment method
Source: PubMed Central journal article supplement — Nucleic Acids Res. 2012 Jan 9;40(7):e52. doi: 10.1093/nar/gkr1292 (PMC3326335; doi:10.1093/nar/gkr1292), 2012-01-09
Supplement: supp_gkr1292_nar-02222-met-n-2011-File009.pdf [file supp_gkr1292_nar-02222-met-n-2011-File009.pdf]

# Supplementary Material: Use of ChIP-Seq data for the design of a multiple promoter alignment method

Ionas Erb<sup>1</sup>, Juan González-Vallinas<sup>2</sup>, Giovanni Bussotti<sup>1</sup>, Enrique Blanco<sup>3</sup>, Eduardo Eyra<sup>2,4</sup> and Cédric Notredame<sup>1</sup>

<sup>1</sup>Centre for Genomic Regulation (CRG). Dr. Aiguader 88, E08003 Barcelona, Spain

<sup>2</sup>Universitat Pompeu Fabra. Dr. Aiguader 88, E08003, Barcelona, Spain

<sup>3</sup>Departament de Genètica / Institut de Biomedicina (IBUB), Universitat de Barcelona (UB). Av. Diagonal 643 08028 Barcelona (Spain).

<sup>4</sup>Catalan Institution for Research and Advanced Studies (ICREA), Passeig Lluís Companys 23, E08010, Barcelona, Spain

|         | CEBPA      | HNF4a      |
|---------|------------|------------|
| Human   | 65 756 959 | 47 288 137 |
| Mouse   | 78 073 807 | 44 956 816 |
| Dog     | 61 395 140 | 47 339 609 |
| Chicken | 32 465 702 | -          |

**Table S1.** Total reads mapped (sums over various individuals of one species).

|         | CEBPA  | HNF4a  |
|---------|--------|--------|
| Human   | 75 791 | 39 300 |
| Mouse   | 29 051 | 19 284 |
| Dog     | 44 223 | 38 764 |
| Chicken | 18 799 | -      |

**Table S2.** Total peaks called ( $p \leq 10^{-6}$ ).

|         | CEBPA       | HNF4a       |
|---------|-------------|-------------|
| Human   | 1399 (1.8%) | 1494 (3.8%) |
| Mouse   | 523 (1.8%)  | 435 (2.3%)  |
| Dog     | 560 (1.3%)  | 861 (2.2%)  |
| Chicken | 423 (2.3%)  | -           |

**Table S3.** Peaks falling in orthologous promoter cliques.

|               | CEBPA | HNF4a |
|---------------|-------|-------|
| Chicken-Dog   | 46    | -     |
| Chicken-Human | 101   | -     |
| Chicken-Mouse | 33    | -     |
| Dog-Human     | 165   | 282   |
| Dog-Mouse     | 83    | 135   |
| Human-Mouse   | 184   | 159   |

**Table S4.** Promoter cliques that contain peaks from both species of a given species pair.

|               | CEBPA | HNF4a |
|---------------|-------|-------|
| Chicken-Dog   | 10    | -     |
| Chicken-Human | 12    | -     |
| Chicken-Mouse | 10    | -     |
| Dog-Human     | 64    | 88    |
| Dog-Mouse     | 37    | 60    |
| Human-Mouse   | 80    | 75    |

**Table S5.** Pairs of overlapping ChIP-Seq regions falling in orthologous promoter cliques (Pro-Coffee Alignments)

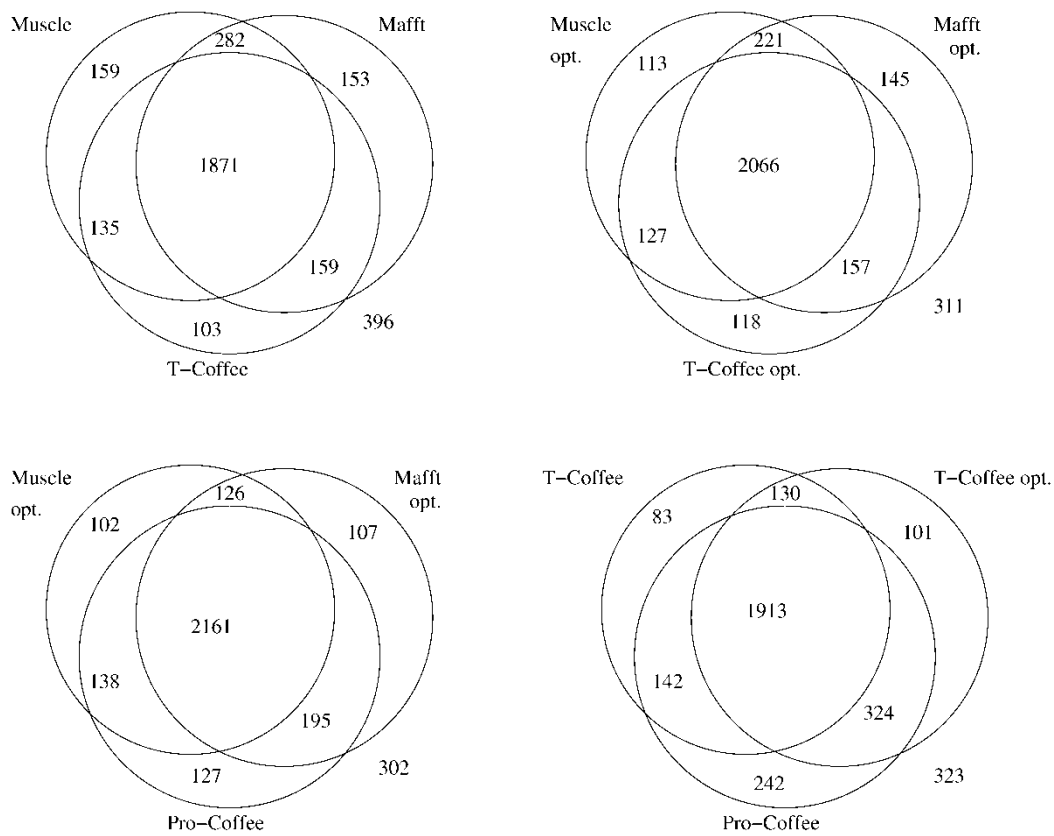

**Figure S1.** Venn diagrams for the homology benchmark. Numbers stand for correctly predicted orthologs from the full set of 3258 cliques. Top row: Optimization increases the intersection of methods, which goes up by 6% to 63.4% of all orthologs. Bottom left: Replacing the optimized T-Coffee by Pro-Coffee increases this figure by another 3%. In this case the percentage of orthologs no method is able to predict correctly is still 9.3%. Bottom right: Optimization and method improvement does not lead to a mere growth of the correct set but also causes a drift that leaves previously identified orthologs undiscovered. This is however compensated by larger sets of newly identified orthologs.

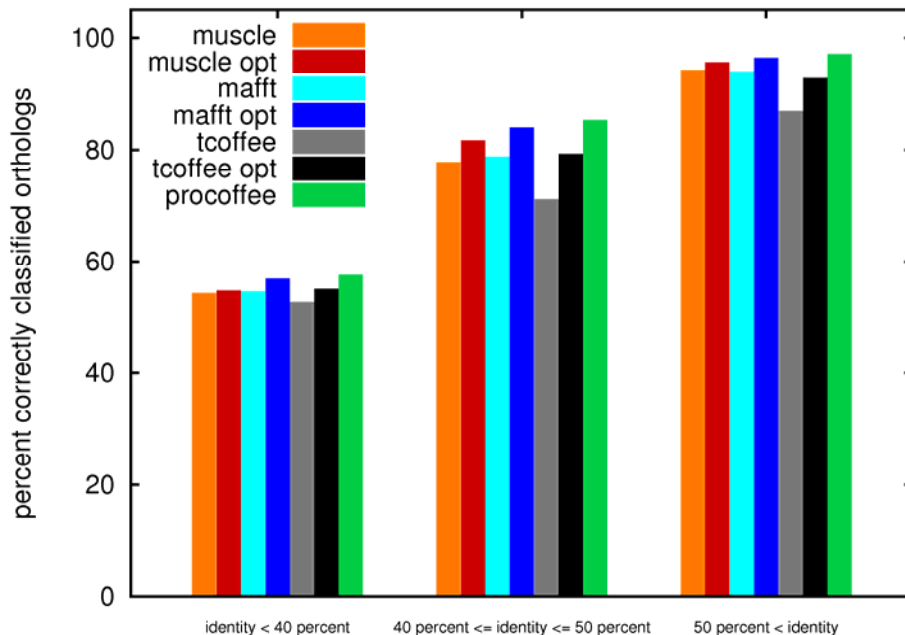

**Figure S2.** Homology benchmark on three subsets of orthologs whose alignments fall in a certain range of percent identity. Identity of orthologs was determined from averaging the quantity over alignments of the three best methods (optimized versions of mafft and muscle and procoffee). Then the ortholog classification was done on each subset separately, where the low identity set comprises 897 orthologs with average identity below 40%, the middle identity set 1659 orthologs with identities between 40% and 50%, and the high identity set 720 orthologs with identities beyond 50%. Optimized methods perform consistently better on all sets and there is little effect of identity on performance ranking of the methods.

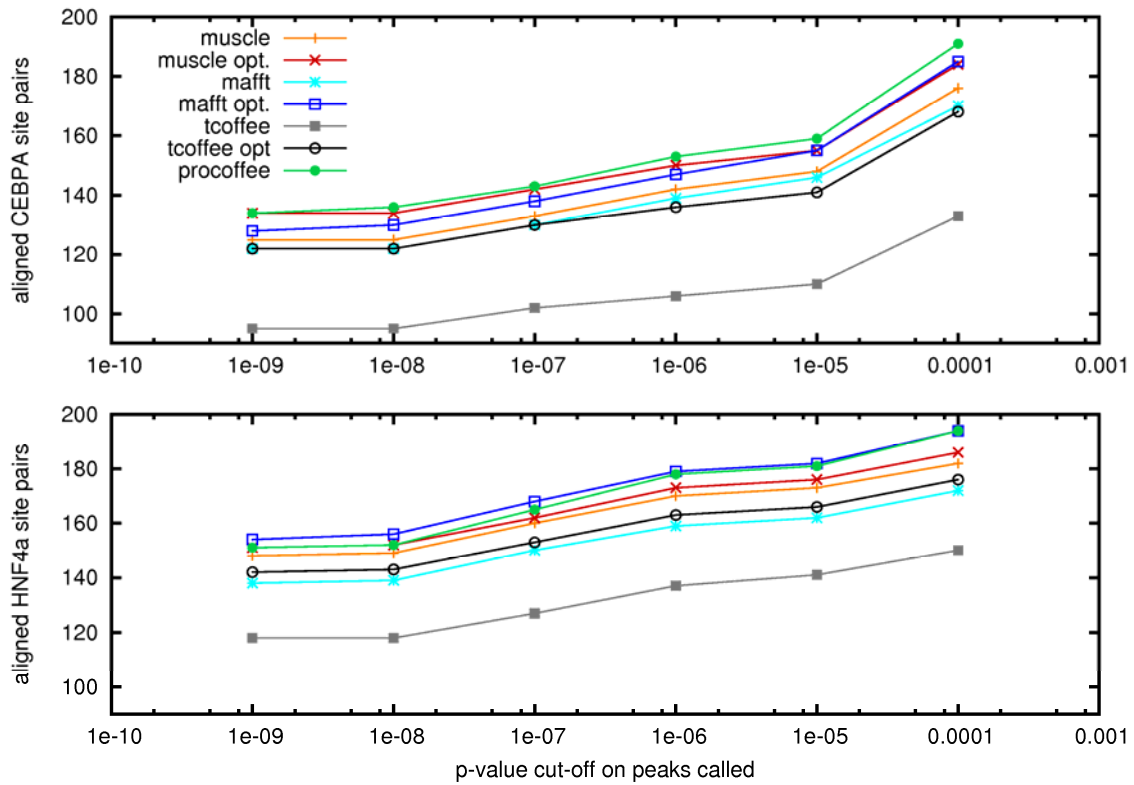

**Figure S3.** Total number of aligned binding sites depending on peak quality cut-off (use:  $p \leq 10^{-6}$ ). Cut-off changes within this range of significance basically do not affect method rankings.

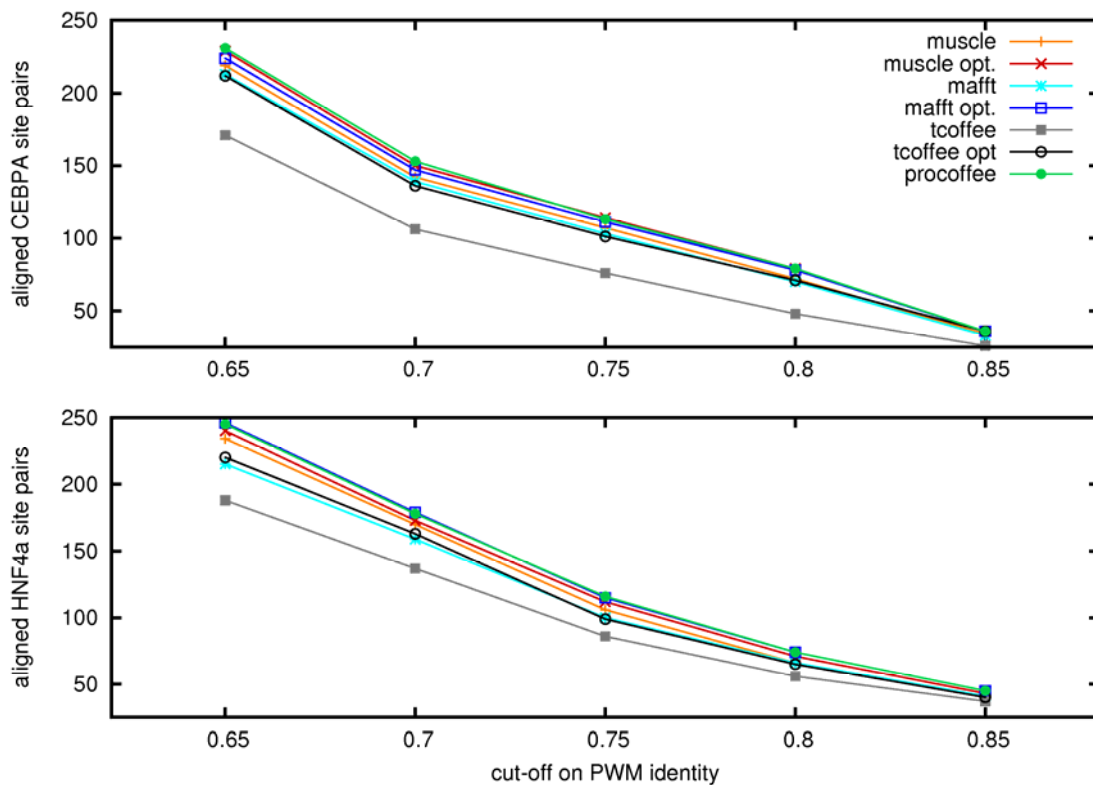

**Figure S4.** Total number of aligned binding sites depending on site quality (TFBS-PWM identity) cut-off (use: 70% identity). Note that we are only considering sites that fall in factor binding regions. Again, there is little effect on ranking of methods.

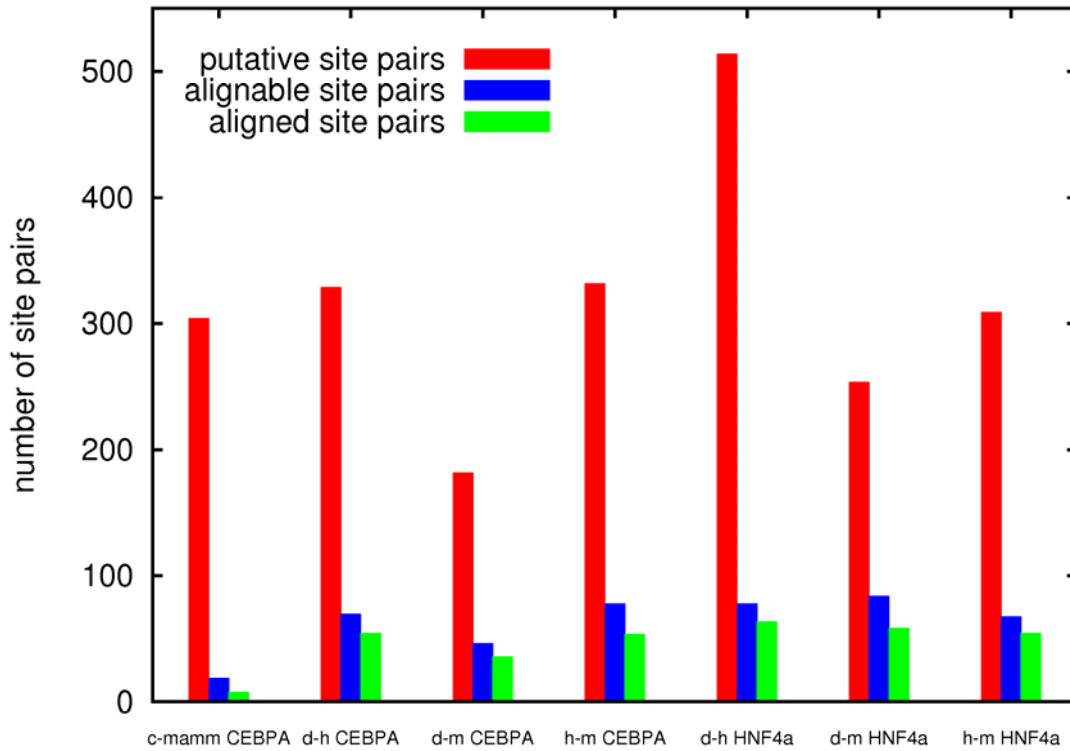

**Figure S5.** Aligned TFBS pairs compared to TFBS pairs contained in orthologous promoter cliques (“putative site pairs”) and in overlapping ChIP-Seq regions (“alignable site pairs”) using Pro-Coffee alignments. See Materials and methods for definitions.

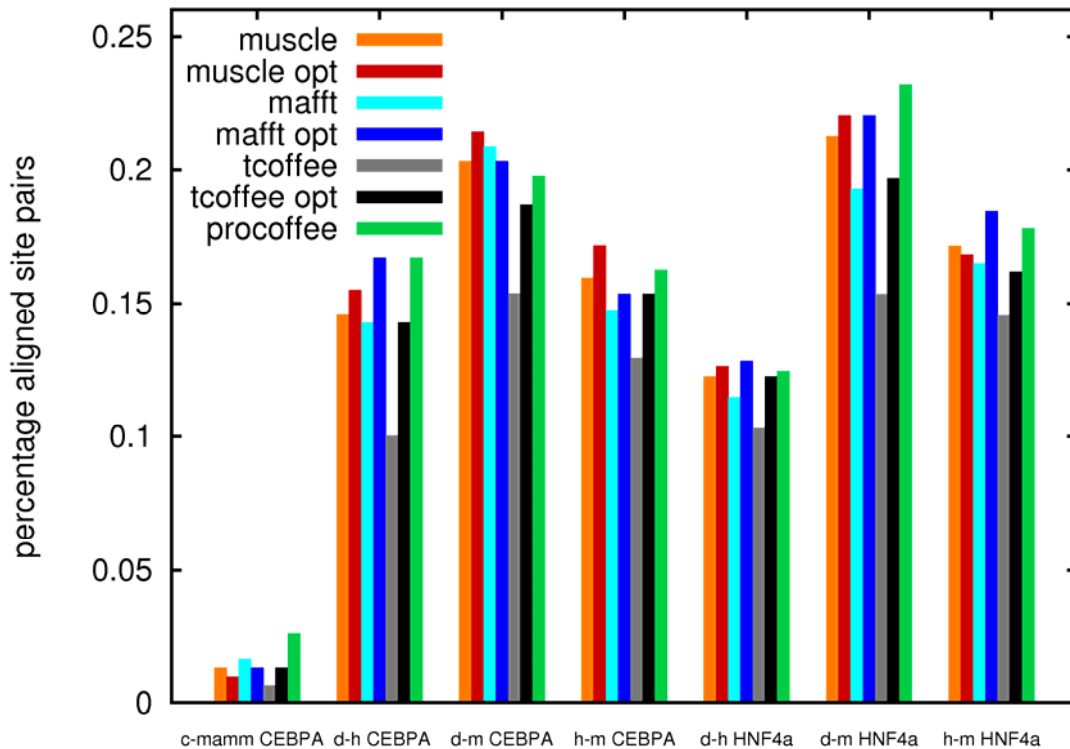

**Figure S6.** Aligned site pairs as a percentage of putative site pairs. For the example Pro-Coffee, these are the numbers represented by the green bars in Supplementary Figure S5 divided by the numbers represented by the corresponding red bars. Methods usually improve on these data sets when trained on the ortholog benchmark: Muscle and Mafft improve on 5, T-Coffee on all 7 data sets.

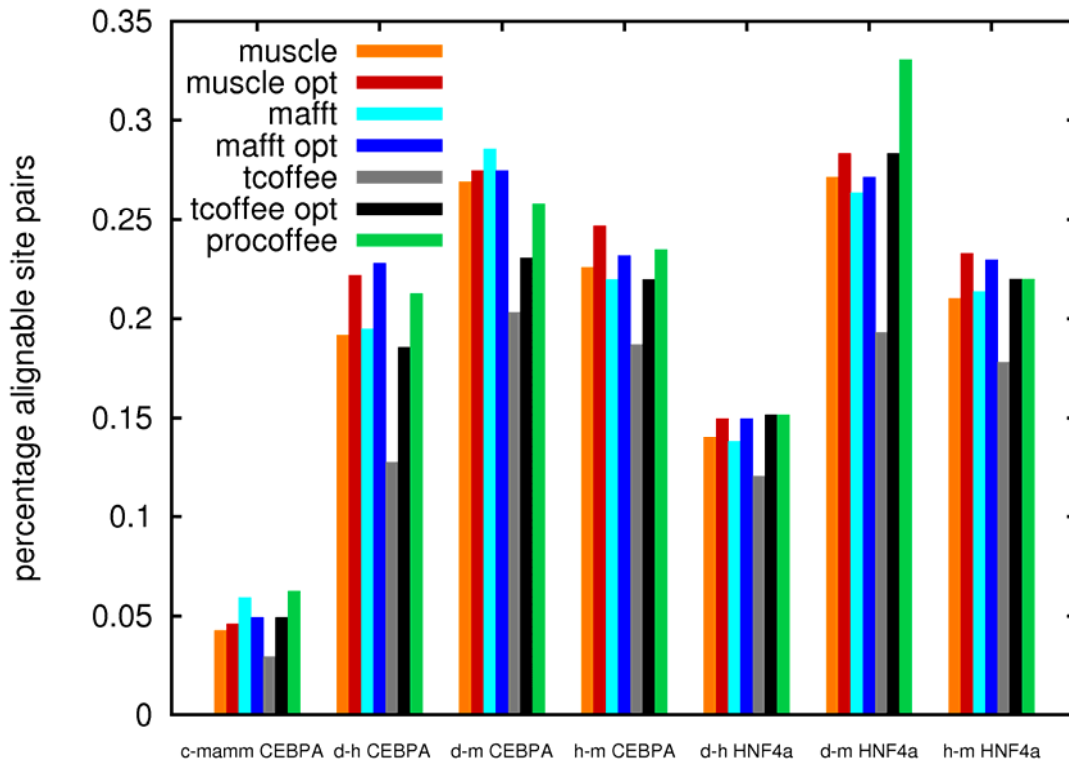

**Figure S7.** Percentage of alignable site pairs. For the example Pro-Coffee, these are the numbers represented by the blue bars in Supplementary Figure S5 divided by the numbers represented by the corresponding red bars. The increase in alignable site pairs with method tuning corresponds to an improvement of large-scale properties of alignments (more overlapping factor-binding regions). It is this global property that mostly profits from tuning on the ortholog benchmark: Mafft improves on 5 data sets, Muscle and T-Coffee on all 7 data sets.

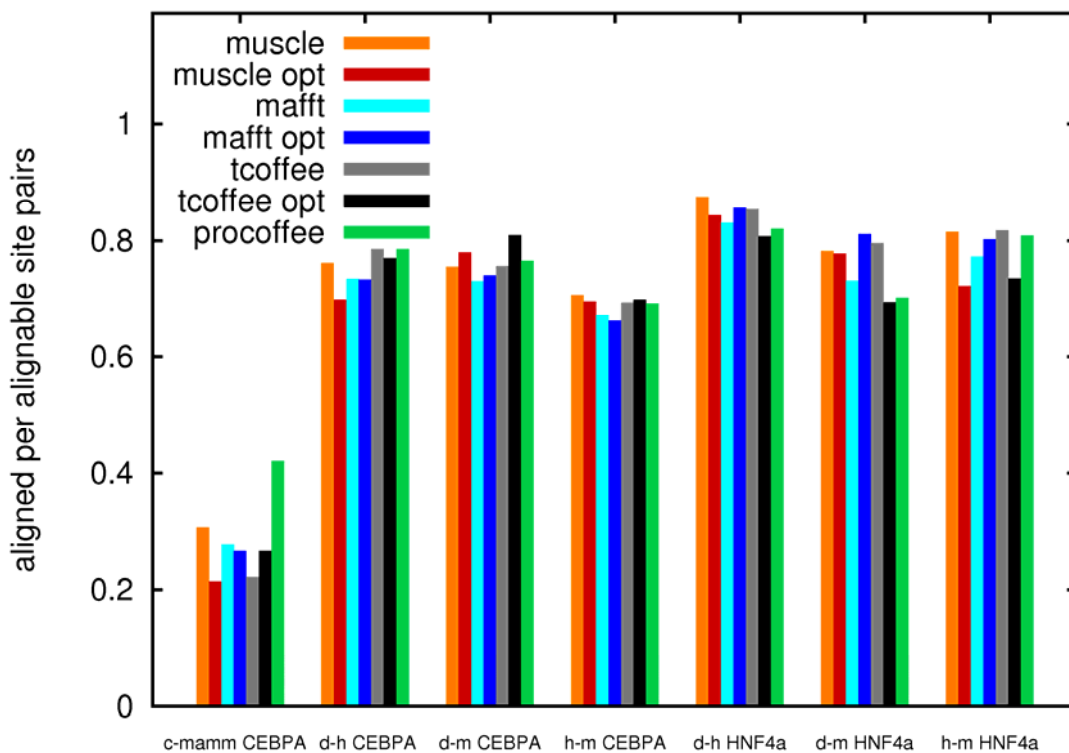

**Figure S8.** Ratio of aligned site pairs over alignable pairs. For the example Pro-Coffee, these are the numbers represented by the green bars in Supplementary Figure S5 divided by the numbers represented by the corresponding blue bars. An increase in aligned per alignable sites corresponds to an improvement of fine-grained alignment properties. Our method tuning on the ortholog benchmark usually does not improve this property, it can often even change to the worse: Mafft still improves on 4 data sets, Muscle on only 1, and T-Coffee on 3.
